# Supplementary material
Source: Springer Nature journal article supplement (https://www.springermedizin.de/resource/supplementary/13058_2011_2984_MOESM6_ESM.pdf/9703014)

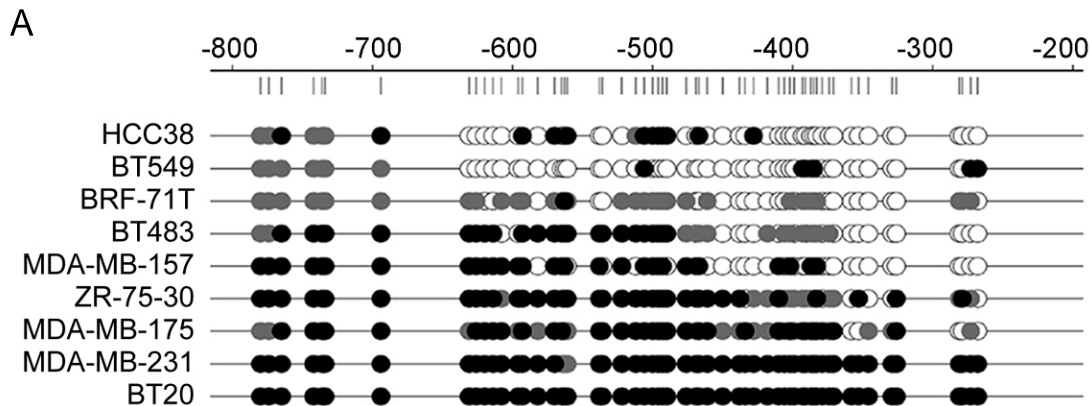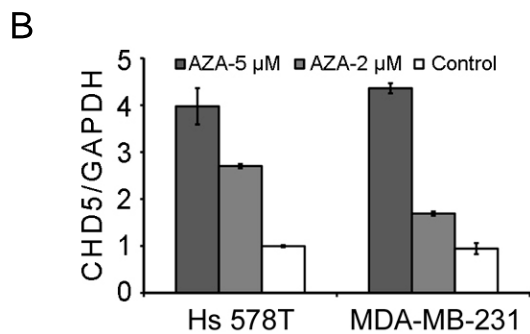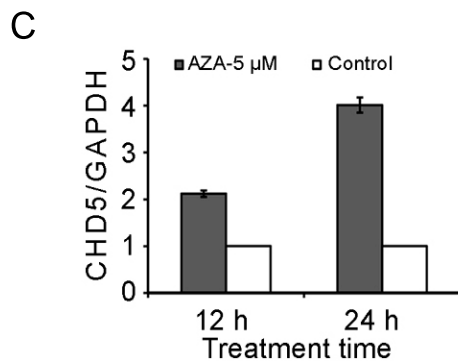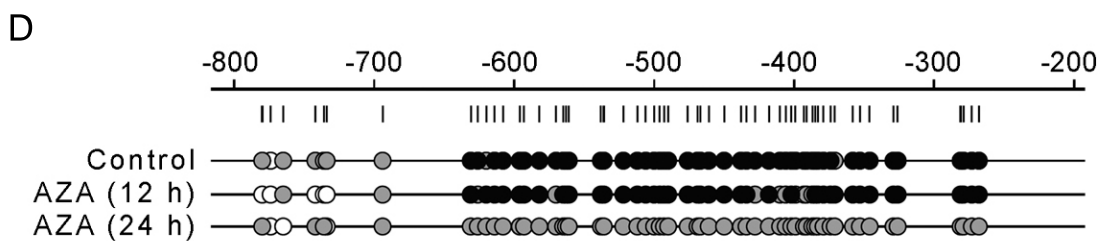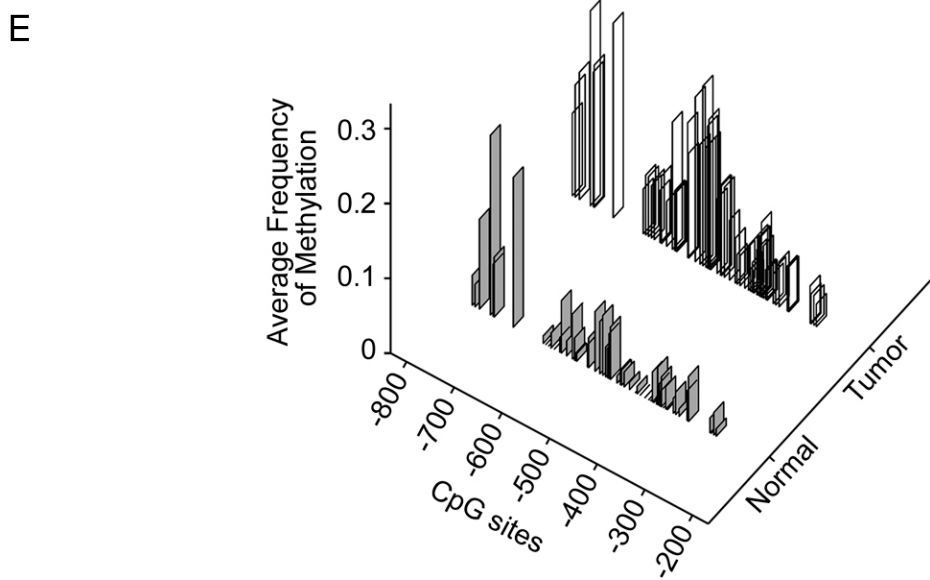

Supplement: MOESM6 [file 9703014]
